# Supplementary material for: Patient perspectives on the therapeutic profile of botulinum neurotoxin type A in cervical dystonia
Source: PubMed Central journal article supplement (PMC7914227; doi:10.1007/s00415-020-10217-7), 2020-09-16
Supplement: 415_2020_10217_MOESM1_ESM.pdf [file 415_2020_10217_MOESM1_ESM.pdf]

## **Understanding the waning of BoNT-A effects and its impact on the quality of life of patients living with cervical dystonia**

### **Description message:**

Hello,

We invite you to participate in an international survey designed to **better understand patients' experience with Botulinum Toxin A injections**. These injections are given to improve symptoms related with cervical dystonia.

As a patient, your feedback about symptoms and treatments will be useful to better understand your needs and how we can improve treatments.

The data collected through this study will only be **shared anonymously and in aggregate form**, which means that it will not be possible to identify the participants.

These aggregate results will be shared with Ipsen, a pharmaceutical company that manufactures a treatment for spasticity and cervical dystonia.

This study will be also the subject of **scientific publications** that will be redacted in collaboration with an **international team of 4 medical experts**.

*According to the current legislation, you have the right to access, rectify and oppose to the treatment of your data.*

*To learn more about the way your data will be treated and about the terms of exercise of your rights, please read our [Information and Consent notice](#).*

*Your participation in the survey is voluntary. By clicking on the "Start" button, you confirm:*

- 1. your willingness to participate in the study; and*
- 2. that you give your explicit consent to have your personal data collected and processed in the way described in our [Information and Consent Notice](#).*

*You may withdraw your consent at any time without providing a reason, without affecting the lawfulness of the processing carried out prior to the withdrawal of your consent.*

Thank you in advance for your contribution,

The Carentity Team

During the questionnaire, you will be asked **the name of the last Botulinum Toxin A injections you received**. If you do not remember, or are not sure about the name, please refer to your doctor or your medical centre before starting the survey. This information can also appear on a medical report.

*This questionnaire should take you 10 to 15 minutes to complete. Once you have finished answering a question, you can click on the "Next" button to go to the next question. Please note that you will not be able to move back to the previous question after that.*

*Thank you for your participation.*

## A. Respondent's profile

**1. You are a:**

*(Single answer)*

- Man
- Woman

**2. Your year of birth:**

(yyyy) [SCREEN OUT if age<18 y/o]

**3. Your country of residence:**

*(Single answer)*

- France
- Germany
- Italy
- Spain
- UK (England, Wales, Scotland, Northern Ireland)
- USA
- Other [Specify] [SCREEN OUT]

**4. Your profile:**

*(Single answer)*

- Patient with a cervical dystonia
- Not suffering with cervical dystonia
- [SCREEN OUT]

**5. Please tell us about your employment status.**

*\*Full-time: more than 30 hours per week*

*\*\*Part-time: less than 30 hours per week*

*(Single answer)*

- I work full-time\*
- I work part-time\*\* because of my condition
- I work part-time\*\* but it is not due to my condition
- I do not work because of my condition
- I do not work but it is not due to my condition (retired, ...)
- I am a full time student
- Other [*Specify*]

**6. When did the first symptoms of your cervical dystonia appear?**

(yyyy)

- I do not remember

**7. When were you diagnosed with cervical dystonia?**

(yyyy)

- I do not remember

**8. During the past 12 months, at the worst time, which of the following symptoms have you experienced as a consequence of your cervical dystonia?**

*(Several possible answers)*

- Muscle spasms
- Involuntary movement of head or shoulders
- Neck pain or other related pain
- Abnormal positioning of the head/neck
- Loss of range of motion (inability to move the head easily)
- Tremors
- Shoulder elevation
- Other [*Specify*]

**9. During the past 12 months, at the worst time, which of the following situations have you experienced as a consequence of your cervical dystonia?**

*(Several possible answers, randomized)*

- Loss of self-confidence due to stigma of visible head/neck dystonia
- Fatigue or lack of energy which limits daytime activities
- Any walking difficulty or balance problem
- Difficulties falling or staying asleep
- Feeling not refreshed after an overnight sleep
- Feeling sad or depressed
- Feeling nervous, worried or frightened for no apparent reason
- Problems with or less interested in sexual activities
- Experience of unpleasant sensations such as numbness, tingling or pins and needles
- Pain, not explained by other conditions
- Experience of light-headedness or dizziness
- Flat moods without the normal 'highs' and 'lows'
- Dystonia is affecting vision
- Any speech problems

- Difficulties while eating such as chewing or swallowing
- Difficulties at work
- Other *[Specify]*
- None

**[In the following questions, we will ask the respondents about their current and past treatments. Respondents who have not received Botulinum Toxin A injections will be screened out (Q10 and Q11).]**

**10. Which treatments are you currently receiving for your cervical dystonia?**

*(Several possible answers)*

- Oral (tablet or liquid) medication (muscle relaxant, oral baclofen...)
- Botulinum toxin A injections (injections into the muscle: Botox<sup>®</sup>, Dysport<sup>®</sup>, Xeomin<sup>®</sup>, brand unknown)
- Botulinum toxin B injections (injections into the muscle: MyoBloc<sup>®</sup>, NeuroBloc<sup>®</sup>, brand unknown)
- Physiotherapy at home
- Physiotherapy at hospital/clinic
- Surgery/deep brain stimulation
- Psychological support/counselling support
- Traditional/complementary medicine (e.g. Chinese medicine, osteopathy, homeopathy, etc)
- Other *[Specify]*
- I do not take any specific treatment for my cervical dystonia

**11. In the past, which treatments did you receive for your cervical dystonia?**

*(Several possible answers)*

- Oral (tablet or liquid) medication (muscle relaxant, oral baclofen...)
- Botulinum toxin A injections (injections into the muscle: Botox<sup>®</sup>, Dysport<sup>®</sup>, Xeomin<sup>®</sup>, brand unknown)
- Botulinum toxin B injections (injections into the muscle: MyoBloc<sup>®</sup>, NeuroBloc<sup>®</sup>, brand unknown)
- Physiotherapy at home
- Physiotherapy at hospital/clinic
- Surgery/deep brain stimulation
- Psychological support/counselling support
- Traditional/complementary medicine (e.g. Chinese medicine, osteopathy, homeopathy, etc)
- Other *[Specify]*
- I did not take any specific treatment for my cervical dystonia in the past

**[Respondents who have not received Botulinum Toxin A injections will be screened out (Q10 and Q11).]**

**[For patients who received BoNT-A injections in the past only]**

**12. Did you stop receiving Botulinum Toxin A injections more than one year ago?**

*(Single answer)*

- Yes **[SCREEN OUT]**
- No

## B. Experience with BoNT-A injections

[For patients who received BoNT-A injections in the past only]

### INSERT:

For the next part of the questionnaire, we are going to ask you questions about your Botulinum Toxin A injections. **Please answer for the period of time you were receiving Botulinum Toxin A injections.**

#### 13. What is the name of the Botulinum Toxin A injections **you last received?**

*If you don't remember the name of the last Botulinum Toxin A injections received, please refer to your doctor or your medical centre. This information can also appear on a medical report.*

*(Single answer)*

- Botox®
- Dysport®
- Xeomin®
- I do not know

#### 14. When did you start receiving Botulinum Toxin A injections?

(yyyy)

- I do not remember

#### 15. **In total, since Botulinum Toxin A treatment was started, how many times did you receive Botulinum Toxin A injections for your cervical dystonia?**

*(Single answer)*

- 1 session of injections [SCREEN OUT]
- 2 sessions of injections
- 3 sessions of injections
- 4 sessions of injections **or more**

#### 16. **On average, how many times per year do you receive Botulinum Toxin A injections?**

*(Minimum=1, maximum=6)*

*(Numeric)*

- I do not know

#### 17. **When did you receive your last session of Botulinum Toxin A injections for your cervical dystonia?**

*(Single answer)*

- Less than 1 month ago
- 1 month to less than 2 months ago
- 2 months to less than 3 months ago
- 3 months to less than 4 months ago
- 4 months to less than 6 months ago
- 6 months ago or more
- I do not remember

**18. What was the time between your two last sessions of Botulinum Toxin A injections for your cervical dystonia?**

*(Single answer)*

- Less than 3 months
- 3 months to less than 4 months
- 4 months to less than 6 months
- 6 months or more
- I do not remember

**19. Please select the answer which best describes how your sessions of Botulinum Toxin A injections are scheduled.**

*(Single answer)*

- The interval between two sessions of injections is always the same.
- The interval between two sessions of injections is not regular, the sessions are arranged when needed depending on my symptoms.
- The interval between two sessions of injections is not regular, the sessions are arranged depending on the availability of the doctor/hospital.
- Other [*Specify*]

**19bis. What do you think about the way your sessions of Botulinum Toxin A are scheduled?**

*(Single answer)*

- It's well adapted to my situation.
- I would like the sessions to be arranged differently.
- Other [*Specify*]

**20. On average, how many days or weeks after your Botulinum Toxin A injections do you experience:**

*(Numeric, minimum=0)*

[The first effect of the treatment on your cervical dystonia] (in days or weeks)  I do not know

[The maximum effects of the treatment on your cervical dystonia] (in day or weeks)  I do not know

## C. Experience with the waning of BoNT-A effects

21. During your first sessions of Botulinum Toxin A injections, did your doctor inform you that symptoms could return between two sessions of injections?

(Single answer)

- Yes
- No
- I don't remember

22. In general, do your cervical dystonia pre-existing symptoms reappear between 2 sessions of Botulinum Toxin A injections?

(Single answer)

- Yes
- No [Respondents who checked "no" and are still receiving BoNT-A treatment will be sent to the end of the questionnaire]

23. In general, how long after your Botulinum Toxin A injections do your cervical dystonia pre-existing symptoms begin to reappear?

(Numeric, minimum=0)

(in days or weeks)  I do not know

24. Among the following pre-existing symptoms, could you select the ones which reappear between two sessions of Botulinum Toxin A injections in their order of reappearance?

*The first symptom you select is the one which reappears first and so on. If a symptom does not appear between two Botulinum Toxin A treatments, please do not select it. If you want to change the order, or remove a symptom from the ranking, you can unselect it by clicking on it again. 1: this symptom reappears first, 2: this symptom is the second to reappear...*

(Ranking question, minimum 1 item)

- Muscle spasms
- Involuntary movement of head or shoulders
- Neck pain or other related pain
- Abnormal positioning of the head/neck
- Loss of range of motion (inability to move the head easily)
- Tremors
- Shoulder elevation

[Question 25 will be asked for each symptom selected at question 24]

25. At these 3 different points of treatment with Botulinum Toxin A, how would you rate the intensity of your [SYMPTOMS Q24] as a consequence of your cervical dystonia?

(1 answer per line, 0 = No symptoms, 10 = Very strong symptoms)

For each aspect, drag the slider to the desired position: left end = no symptoms, right end = very strong symptoms.

|                                                                                                 |                                              |
|-------------------------------------------------------------------------------------------------|----------------------------------------------|
| <i>When the effects of the injections are at their maximum (peak effect)</i>                    | No symptoms -----○----- Very strong symptoms |
| <i>When the pre-existing symptoms reappear/ the effects of the injections start wearing off</i> | No symptoms -----○----- Very strong symptoms |
| <i>The day before receiving new injections</i>                                                  | No symptoms -----○----- Very strong symptoms |

## D. Impact of the waning of BoNT-A effects on the patient's quality of life and expectations

[Q26 will be asked for patients currently working only]

26. How does the reappearance of your cervical dystonia pre-existing symptoms between two sessions of Botulinum Toxin A injections affect your work?

*(Several possible answers)*

- I have to take time off work
- I do not feel comfortable at work
- I have to work less (start later and/or stop earlier than I would otherwise, ...)
- I have to work at home (homeworking)
- I am not as efficient at work as I usually am
- Other *[Specify]*
- It does not affect my work

[Q27 will be asked for the five following items: ]

- ability to perform daily tasks (e.g. grooming, dressing...)
- ability to work
- ability to drive
- ability to have social interactions
- sleep disturbance

27. At these 3 different points of treatment with Botulinum Toxin A, how would you rate the impact of your cervical dystonia on your [QUALITY\_OF\_LIFE\_ITEM]?

*(1 answer per line, 0 = No impact, 10 = Very strong impact)*

|                                                                                                 |                                          |
|-------------------------------------------------------------------------------------------------|------------------------------------------|
| <i>When the effects of the injections are at their maximum (peak effect)</i>                    | No impact -----○----- Very strong impact |
| <i>When the pre-existing symptoms reappear/ the effects of the injections start wearing off</i> | No impact -----○----- Very strong impact |
| <i>The day before receiving new injections</i>                                                  | No impact -----○----- Very strong impact |

**28. When the symptoms of your cervical dystonia reappear between two sessions of Botulinum Toxin A injections, do you inform your doctor about it?**

*(Several possible answers)*

- Yes, I inform my doctor immediately regardless of the intensity of my symptoms
- Yes, I inform my doctor immediately but only when my symptoms are severe
- Yes, I inform my doctor at the next appointment regardless of the intensity of my symptoms
- Yes, I inform my doctor at the next appointment but only when my symptoms are severe
- No > Q30

[Q29 is only asked for patients who have informed their doctor about the reappearance of their pre-existing symptoms]

**29. How did your doctor react when you informed him/her about the earlier reappearance of your cervical dystonia symptoms?**

*(Several possible answers)*

- My doctor prescribed an additional treatment (e.g. oral treatment/physiotherapy) to combat the symptoms
- My doctor increased the dosage of the Botulinum Toxin A injection used in the next treatment session
- My doctor switched my Botulinum Toxin A to another brand
- My doctor asked me to come earlier for the next Botulinum Toxin A injection
- My doctor told me I have to wait for the next injection
- Other [Specify]
- I do not know

[Q30 is only asked for patients who have not informed their doctor about the reappearance of their pre-existing symptoms]

**30. Why did you not inform your doctor about the earlier reappearance of your cervical dystonia symptoms?**

*(Several possible answers)*

- I did not think my doctor could do anything about it
- I did not want to disturb my doctor
- I did not have time to inform my doctor
- My doctor did not have the time
- I was worried that my doctor would prescribe an additional treatment (e.g. oral treatment/physiotherapy)
- I did not want to be prescribed Botulinum Toxin A injections more frequently
- I did not want to have more muscles injected during the same injection session
- I did not want to be prescribed a different Botulinum Toxin treatment
- I was worried that my doctor would not believe me
- Other [Specify]
- I do not know

**31. What improvements with your Botulinum Toxin A treatment do you want in order to avoid reappearance of symptoms between Botulinum Toxin A injection sessions? Please select the most important one:**

*(Single answer)*

- Have a treatment with benefits lasting longer
- Have more muscles injected
- Have higher doses injected
- The possibility to have more frequent injections
- Other [Specify]
- None

## E. Reasons for stopping BoNT-A injections

[For patients who have stopped Botulinum Toxin A injections only]

### 32. Why did you stop receiving Botulinum Toxin A injections for your cervical dystonia?

*(Several possible answers)*

- I had side effect(s) [*Specify*]
- The treatment did not work well enough
- My doctor told me to stop the injections
- The treatment was too expensive
- Logistics constraints (travel to hospital, time spent on injections...) were too inconvenient
- I wanted to take less medication
- Injections were too painful
- Another treatment was proposed as an alternative to Botulinum Toxin injections (e.g. surgery)
- I did not need it anymore
- Other [*Specify*]
- I don't remember
